# Supplementary material for: Scale-Up Synthesis and In Vivo Anti-Tumor Activity of Curcumin Diethyl Disuccinate, an Ester Prodrug of Curcumin, in HepG2-Xenograft Mice
Source: PubMed Central journal article supplement (PMC6723761; doi:10.3390/pharmaceutics11080373), 2019-08-01
Supplement: pharmaceutics-11-00373-s001.pdf [file pharmaceutics-11-00373-s001.pdf]

# Supplementary Materials: Scale-Up Synthesis and In Vivo Anti-Tumor Activity of Curcumin Diethyl Disuccinate, an Ester Prodrug of Curcumin, in HepG2-Xenograft Mice

Chawanphat Muangnoi, Pahweenvaj Ratnatilaka Na Bhuket, Ponsiree Jithavech, Wisut Wichitnithad, Onsiri Srikun, Chakkrapan Nerungsi and Suthiluk Patumraj and Pornchai Rojsitthisak

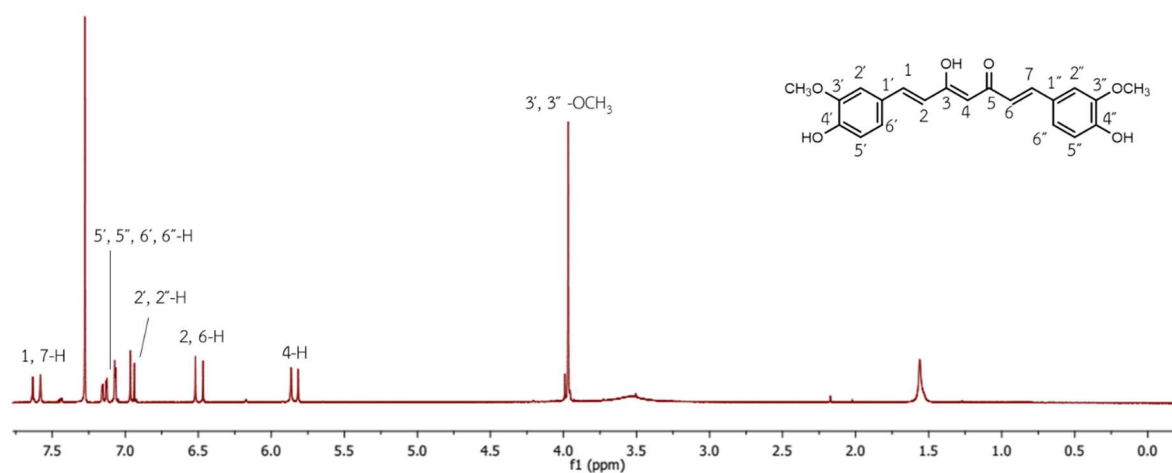

Figure S1.  $^1\text{H-NMR}$  spectrum of curcumin.

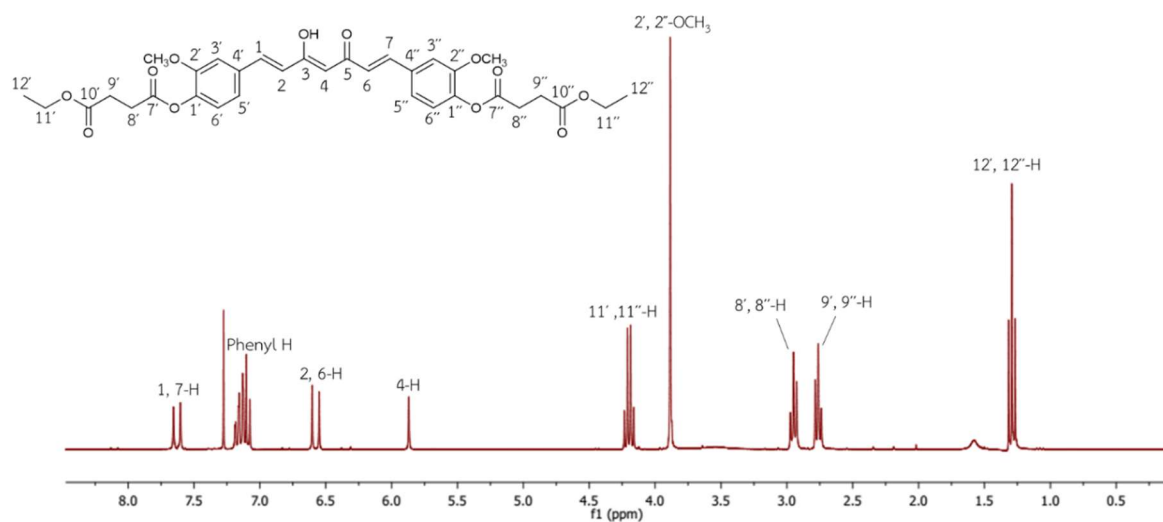

Figure S2.  $^1\text{H-NMR}$  spectrum of curcumin diethyl disuccinate.

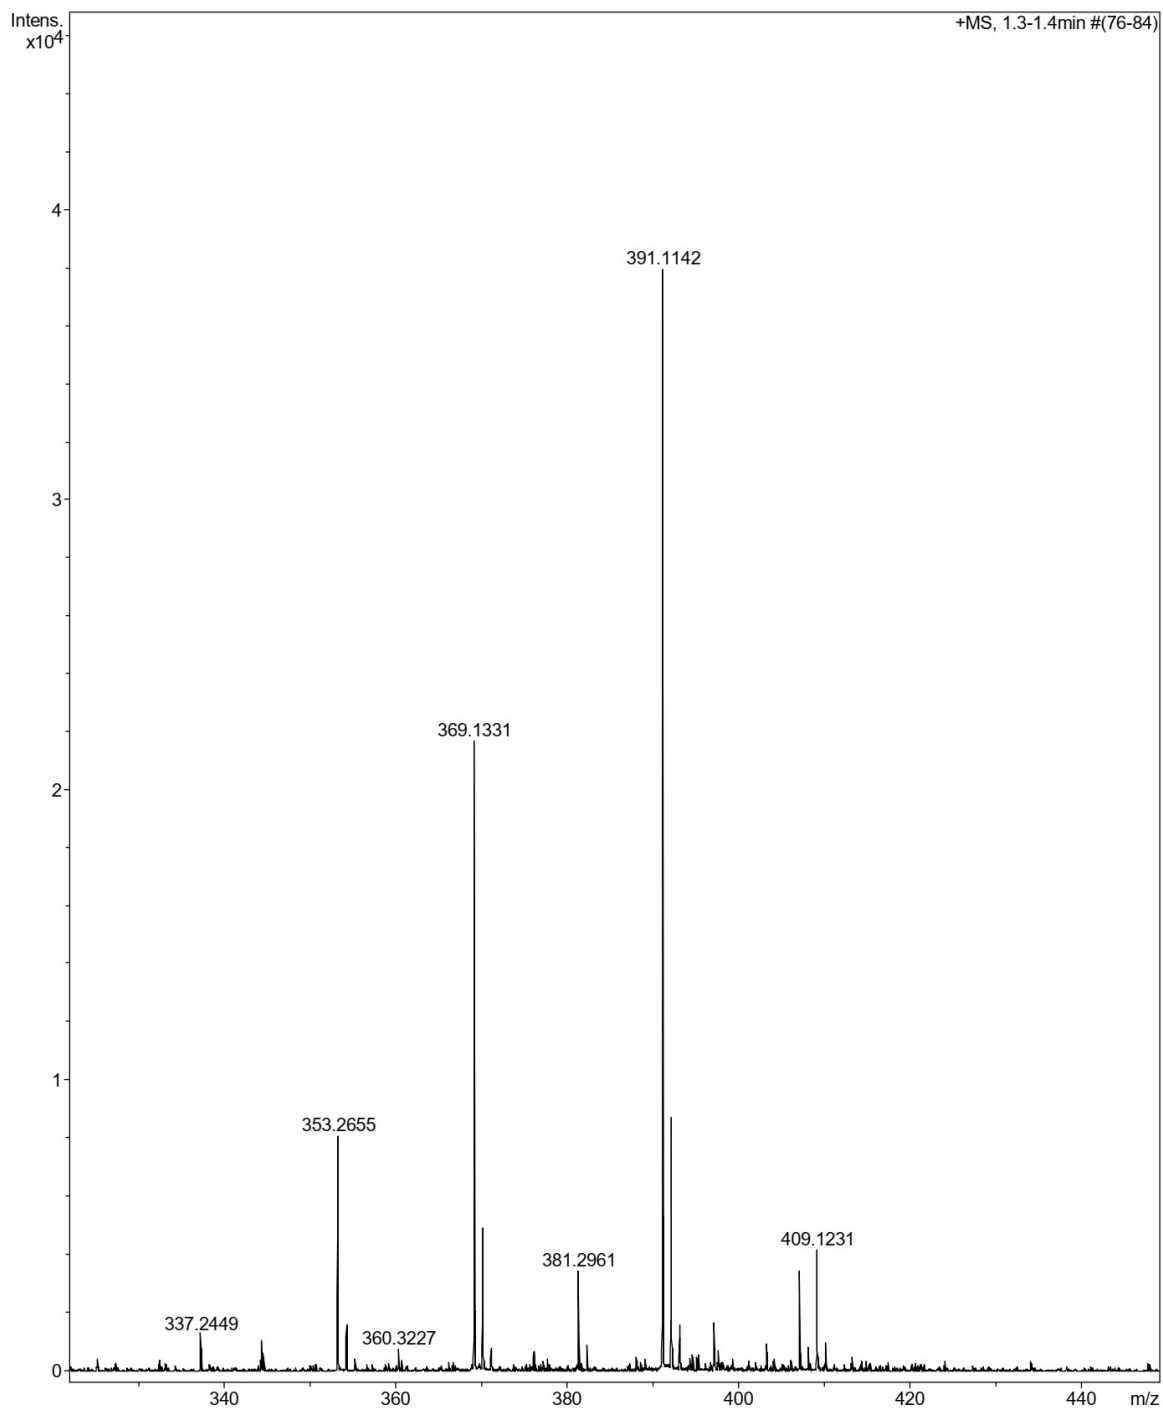

**Figure S3.** Mass spectrum of curcumin.

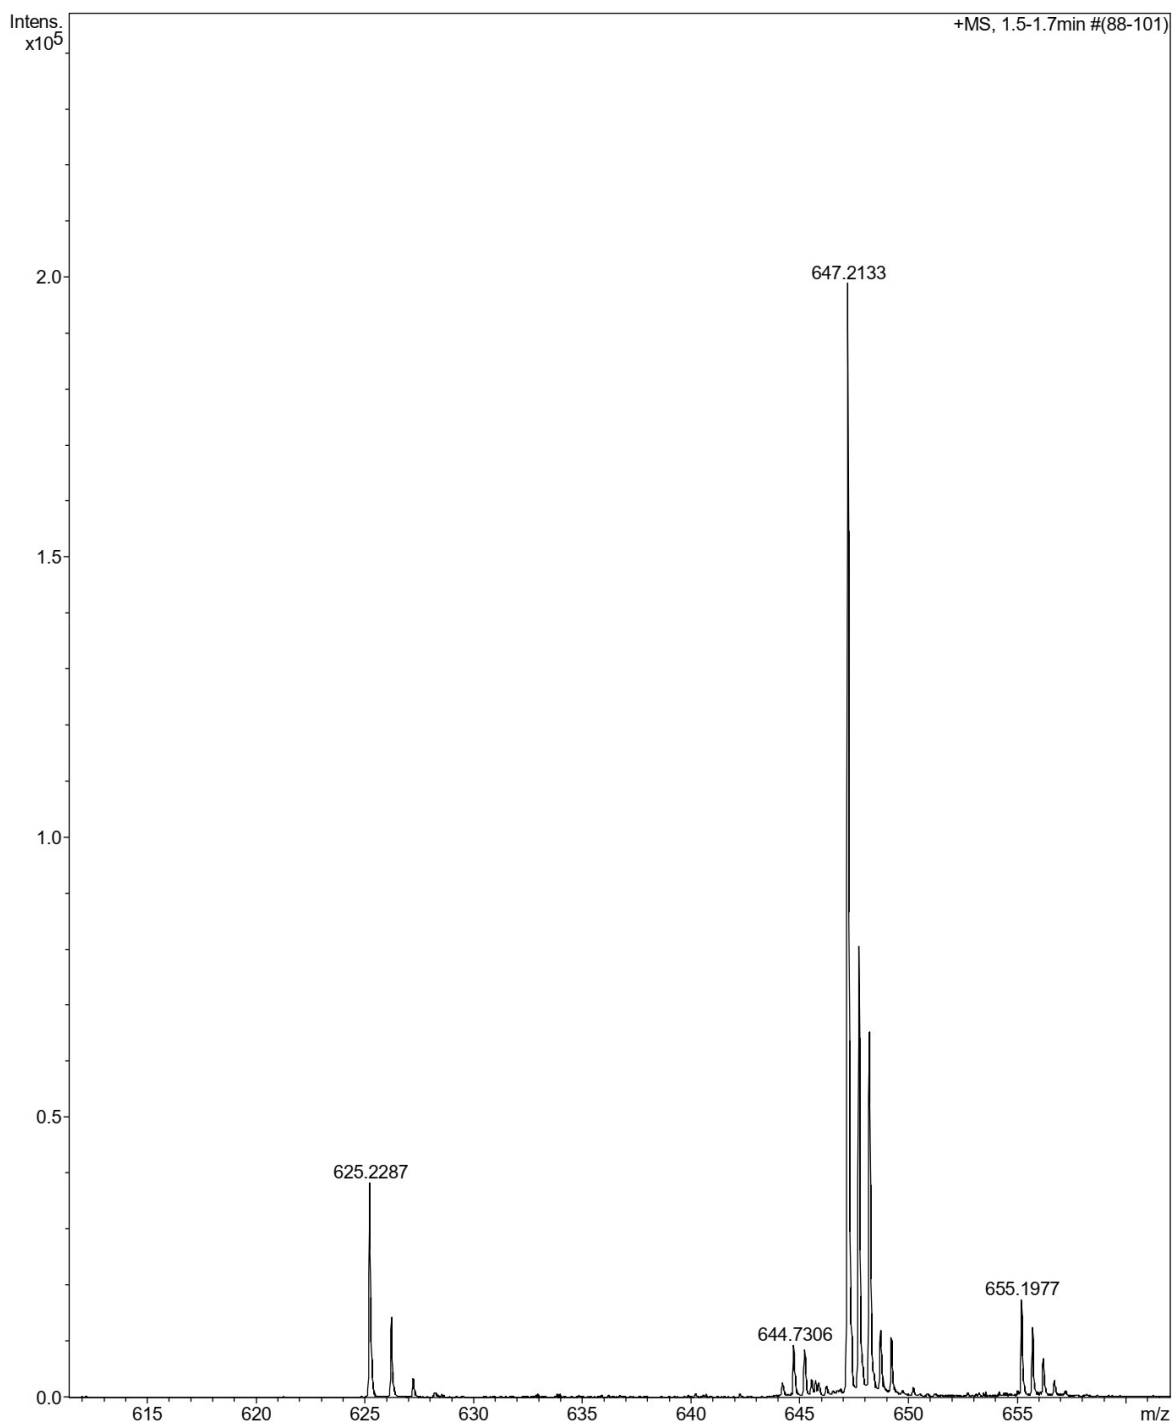

**Figure S4.** Mass spectrum of curcumin diethyl disuccinate.

#### **Determination of chromatographic purity of the prepared curcumin and CurDD**

The prepared curcumin and CurDD were injected into an ultra-high performance liquid chromatographic system to determine chromatographic purity. The chromatographic conditions for the assay were described below.

|                                |                                                    |
|--------------------------------|----------------------------------------------------|
|                                | Initial (0 min) – A:B = 55:45                      |
| Mobile phase                   | 2 min – A:B = 50:50                                |
| A = 0.2 % Formic acid in water | 2.5 min – A:B = 50:50                              |
| B = Acetonitrile               | 5.0 min – A:B = 25:75                              |
|                                | 5.5 min – A:B = 55:45                              |
|                                | 7 min – A:B = 55:45                                |
| Column                         | Acquity UPLC BEC C18 (50 mm x 2.1 mm, 1.7 $\mu$ m) |
| Flow rate                      | 0.5 mL/min                                         |
| Column oven temperature        | 35 $^{\circ}$ C                                    |
| Injection volume               | 2 $\mu$ L                                          |
| Detection wavelength           | $\lambda$ = 400 nm for CurDD, 425 nm for curcumin  |

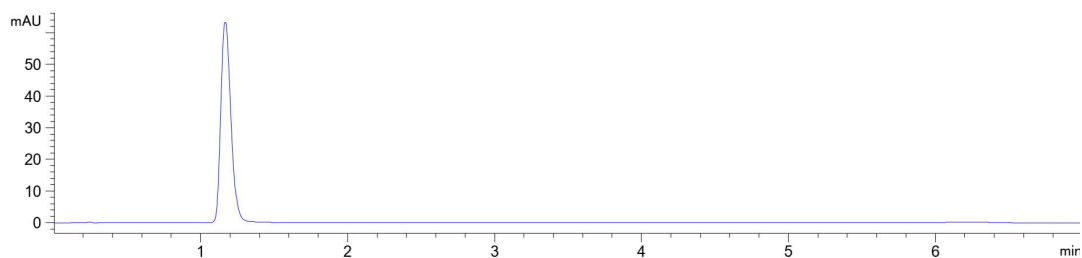

Figure S5. UHPLC chromatogram of curcumin.

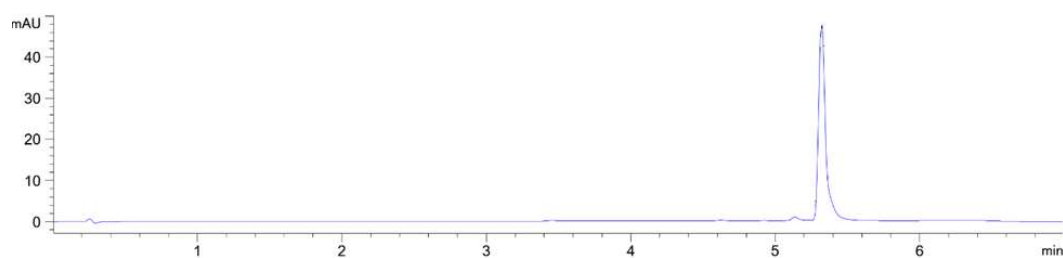

Figure S6. UHPLC chromatogram of curcumin diethyl disuccinate.

### Curcumin (Coupled TwoTheta/Theta)

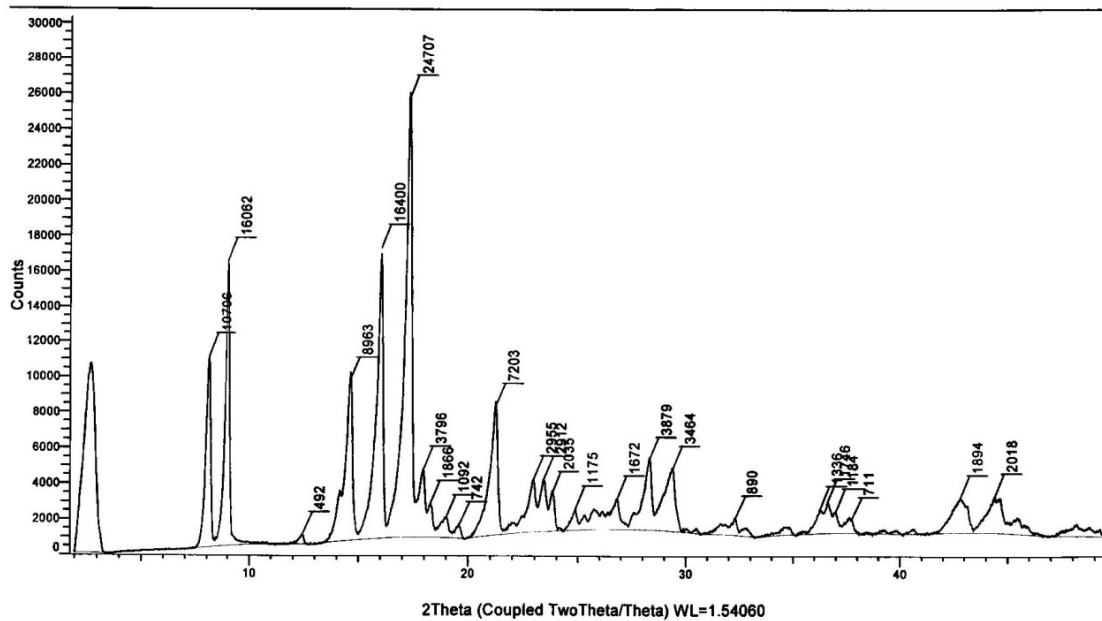

Figure S7. Powder X-ray diffraction spectrum of curcumin.

CDD (Coupled TwoTheta/Theta)

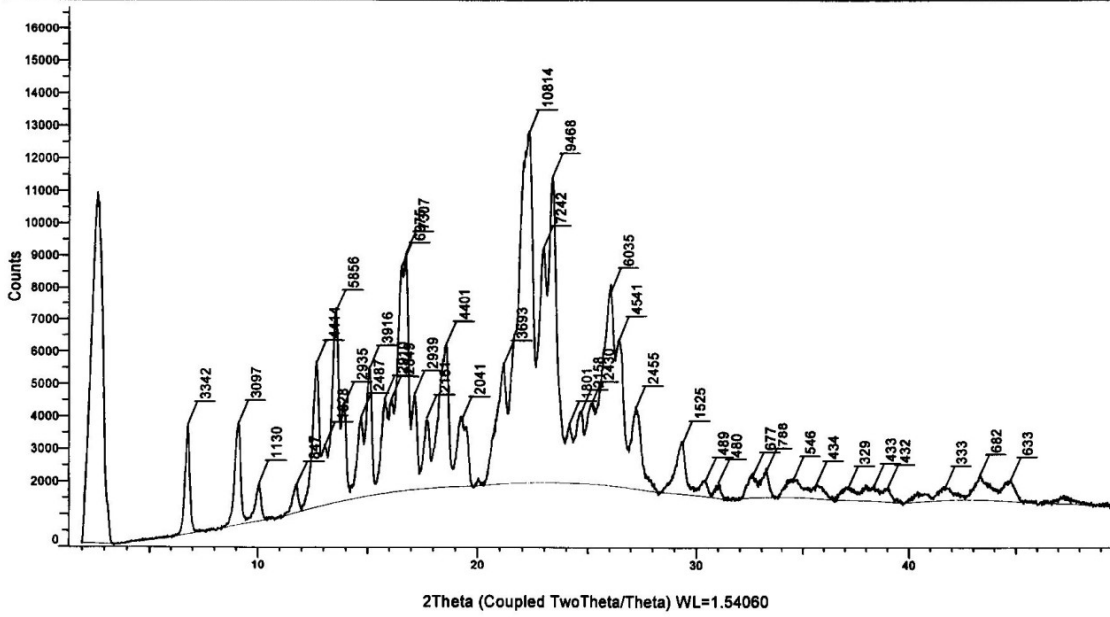

Figure S8. Powder X-ray diffraction spectrum of CurDD.

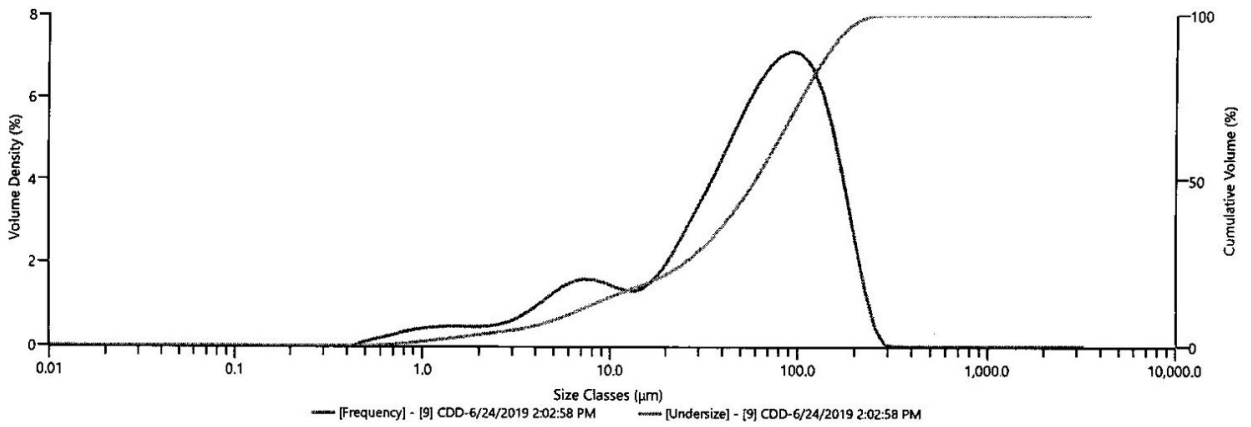

Figure S9. Particle size distribution analysis by laser diffraction of CurDD.

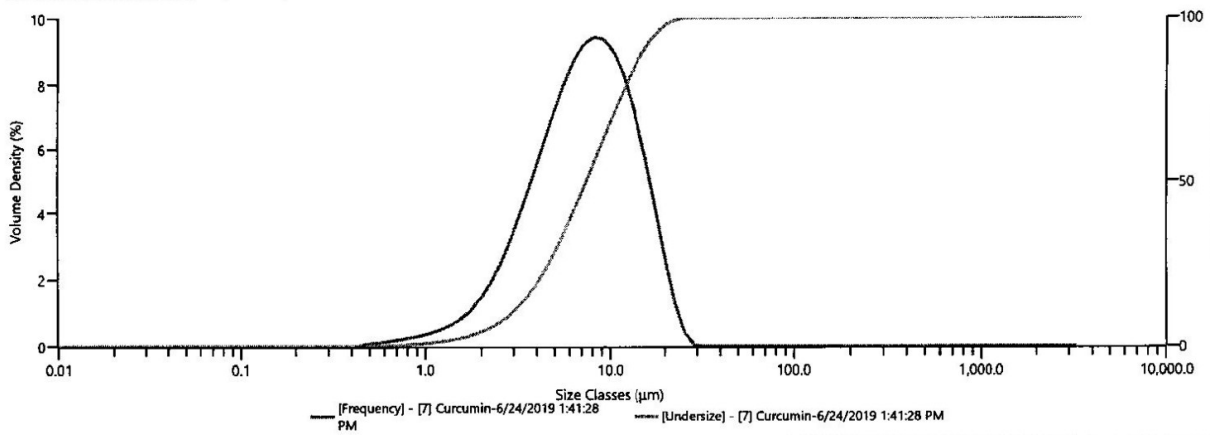

Figure S10. Particle size distribution analysis by laser diffraction of curcumin.
